# Supplementary material for: Application of the AMLprofiler Diagnostic Microarray in the South African Setting
Source: Hindawi journal article supplement (doi:10.1155/2017/2560191), 2017-01-01
Supplement: f1 [file 2560191.f1.pdf]

## Supplementary Table 1

AMLprofiler cytogenetic and molecular marker results from individual patient samples

| Sample ID  | Inv (16)        | t(8;21)         | t(15;17)        | CEBPA           | NPM1         | BAALC           | EVI1            |
|------------|-----------------|-----------------|-----------------|-----------------|--------------|-----------------|-----------------|
| 1a         | Not detected    | Not detected    | Not detected    | Not detected    | Not detected | <b>Detected</b> | Not detected    |
| 2a         | Not detected    | Not detected    | Not detected    | Not detected    | Not detected | Not detected    | Not detected    |
| 3a         | Not detected    | Not detected    | Not detected    | Not detected    | Not detected | Not detected    | Not detected    |
| <b>4a</b>  | Not detected    | Not detected    | Not detected    | Not detected    | Not detected | Not detected    | Not detected    |
| <b>4b</b>  | Not detected    | Not detected    | Not detected    | Not detected    | Not detected | Not detected    | Not detected    |
| <b>5a</b>  | Not detected    | Not detected    | Not detected    | <b>Detected</b> | Not detected | Not detected    | Not detected    |
| <b>5b</b>  | Not detected    | Not detected    | Not detected    | Not detected    | Not detected | Not detected    | Not detected    |
| <b>6a</b>  | Not detected    | Not detected    | <b>Detected</b> | Not detected    | Not detected | Not applicable  | Not applicable  |
| <b>6b</b>  | Not detected    | Not detected    | <b>Detected</b> | Not detected    | Not detected | Not applicable  | Not applicable  |
| 7b         | Not detected    | Not detected    | Not detected    | Not detected    | Not detected | Not detected    | Not detected    |
| 8a         | Not detected    | <b>Detected</b> | Not detected    | Not detected    | Not detected | Not applicable  | Not applicable  |
| 9b         | Not detected    | Not detected    | Not detected    | Not detected    | Not detected | Not detected    | Not detected    |
| <b>10a</b> | Not detected    | <b>Detected</b> | Not detected    | Not detected    | Not detected | Not applicable  | Not applicable  |
| <b>10b</b> | Not detected    | <b>Detected</b> | Not detected    | Not detected    | Not detected | Not applicable  | Not applicable  |
| 11a        | Not detected    | Not detected    | Not detected    | Not detected    | Not detected | Not detected    | <b>Detected</b> |
| <b>12a</b> | <b>Detected</b> | Not detected    | Not detected    | Not detected    | Not detected | Not applicable  | Not applicable  |
| <b>12b</b> | <b>Detected</b> | Not detected    | Not detected    | Not detected    | Not detected | Not applicable  | Not applicable  |
| <b>13a</b> | Not detected    | Not detected    | Not detected    | Not detected    | Not detected | Not detected    | <b>Detected</b> |
| <b>13b</b> | Not detected    | Not detected    | Not detected    | Not detected    | Not detected | Not detected    | <b>Detected</b> |
| 14a        | Not detected    | Not detected    | Not detected    | Not detected    | Not detected | <b>Detected</b> | <b>Detected</b> |
| 15a        | Not detected    | Not detected    | Not detected    | Not detected    | Not detected | <b>Detected</b> | Not detected    |



|            |                 |                 |                 |              |                 |                 |                 |
|------------|-----------------|-----------------|-----------------|--------------|-----------------|-----------------|-----------------|
| <b>39b</b> | Not detected    | Not detected    | Not detected    | Not detected | Not detected    | Not detected    | Not detected    |
| 40a        | <b>Detected</b> | Not detected    | Not detected    | Not detected | Not detected    | Not applicable  | Not applicable  |
| <b>41a</b> | Not detected    | Not detected    | Not detected    | Not detected | Not detected    | <b>Detected</b> | <b>Detected</b> |
| <b>41b</b> | Not detected    | Not detected    | Not detected    | Not detected | Not detected    | <b>Detected</b> | <b>Detected</b> |
| 42a        | Not detected    | Not detected    | Not detected    | Not detected | Not detected    | Not detected    | Not detected    |
| <b>43a</b> | Not detected    | Not detected    | Not detected    | Not detected | Not detected    | Not detected    | Not detected    |
| <b>43b</b> | Not detected    | Not detected    | Not detected    | Not detected | Not detected    | <b>Detected</b> | Not detected    |
| 44a        | Not detected    | <b>Detected</b> | Not detected    | Not detected | Not detected    | Not applicable  | Not applicable  |
| 45a        | Not detected    | Not detected    | Not detected    | Not detected | <b>Detected</b> | Not detected    | Not detected    |
| 46a        | Not detected    | Not detected    | Not detected    | Not detected | <b>Detected</b> | <b>Detected</b> | Not detected    |
| 47a        | Not detected    | Not detected    | Not detected    | Not detected | Not detected    | Not detected    | Not detected    |
| 48a        | Not detected    | Not detected    | Not detected    | Not detected | Not detected    | Not detected    | Not detected    |
| <b>49a</b> | Not detected    | Not detected    | <b>Detected</b> | Not detected | Not detected    | Not applicable  | Not applicable  |
| <b>49b</b> | Not detected    | Not detected    | Not detected    | Not detected | Not detected    | Not detected    | Not detected    |
| 50a        | Not detected    | <b>Detected</b> | Not detected    | Not detected | Not detected    | Not applicable  | Not applicable  |
| 51a        | Not detected    | Not detected    | Not detected    | Not detected | Not detected    | Not detected    | <b>Detected</b> |
| 52a        | <b>Detected</b> | Not detected    | Not detected    | Not detected | Not detected    | Not applicable  | Not applicable  |
| 53a        | Not detected    | Not detected    | Not detected    | Not detected | Not detected    | <b>Detected</b> | <b>Detected</b> |

“Detected” indicates that a cytogenetic or molecular (gene mutation/expression) marker is present; “Not detected” indicates that it is absent. Where one of the three markers is present that would stratify the patient into the cytogenetically favorable risk group i.e. inv(16)(p13q22)/t(16;16)(p13;q22), t(8;21)(q22;q22), or t(15;17)(q24;q21), the patient cannot be stratified into the intermediate risk group. Since in these cases the expression marker results are not applicable, the report output field reads “Not applicable” for these markers. “a” and “b” in sample ID represents bone marrow and peripheral blood respectively; sample numbers highlighted in bold indicate matched bone marrow and peripheral blood pairs.
